# Supplementary material
Source: PubMed Central journal article supplement (PMC4697459)
Supplement: NIHMS744950-supplement-supplement_1.pdf [file NIHMS744950-supplement-supplement_1.pdf]

## Supplementary Online Material

### **PER2 Differentially Regulates Clock Phosphorylation versus Transcription by Reciprocal Switching of CK1 $\epsilon$ Activity**

Ximing Qin<sup>#</sup>, Tetsuya Mori, Yunfei Zhang<sup>#</sup>, Carl Hirschie Johnson\*

Department of Biological Sciences  
Vanderbilt University

\*To whom correspondence should be addressed:

Dr. Carl Johnson  
Department of Biological Sciences  
VU Station B, Box 35-1634  
Vanderbilt University  
Nashville, TN 37235-1634, USA  
TEL: 615-322-2384  
FAX: 615-936-0205  
Email: [carl.h.johnson@vanderbilt.edu](mailto:carl.h.johnson@vanderbilt.edu)

<sup>#</sup> Present address: Institute of Health Sciences, Anhui University, Hefei, Anhui 230601, China.

## Supplemental Figures

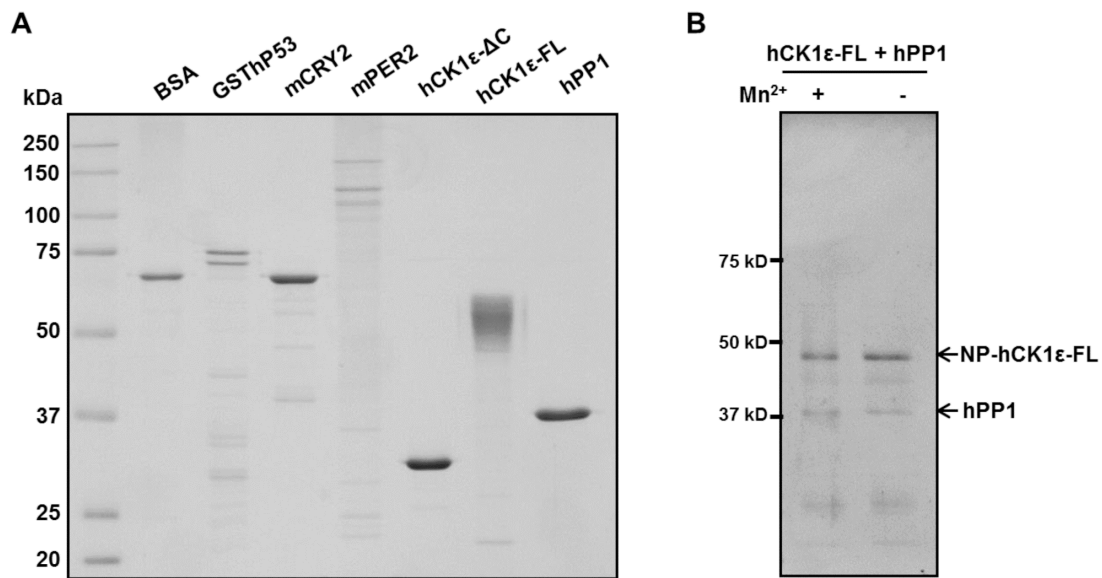

**Figure S1. Proteins used in this study.** (A) Proteins used in this study are resolved by 10% SDS-PAGE and Coomassie Brilliant Blue (CBB) staining. The hCK1ε-FL band is smeared due to autophosphorylation. (B) hCK1ε-FL can be converted to a single band by dephosphorylation with purified hPP1 human phosphatase and resolved by 10% SDS-PAGE. Note that the mobility shift of hCK1ε-FL was centered around the 50 kDa protein marker before hPP1 treatment (panel A), but converts to a single band below 50 kDa after hPP1 treatment (panel B). The dephosphorylation of hCK1ε-FL by hPP1 is Mn<sup>2+</sup> independent, but requires Mg<sup>2+</sup>.

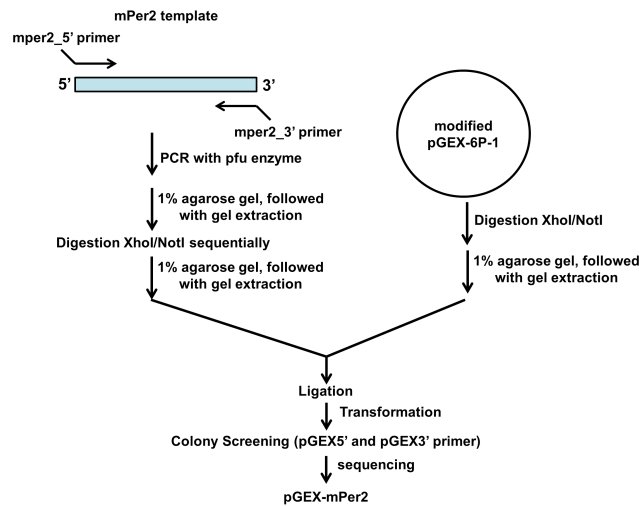

**Figure S2. Procedure for cloning pGEX-mPer2.**

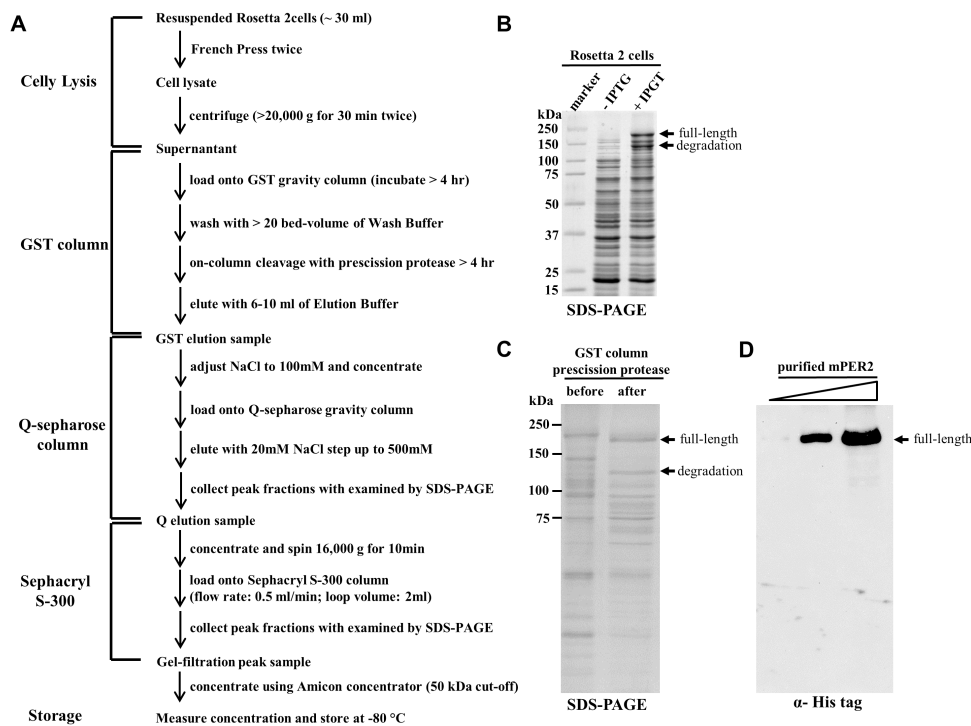

**Figure S3. mPER2 purification process and confirmation of full-length mPER2. (A)** Diagram for mPER2 purification with three steps, GST affinity, Q anion ion exchange, and S-300 gel-filtration. **(B)** The expression of GST-mPER2 in Rosetta2 cells in the presence of 0.5 mM IPTG. A degraded GST-mPER2 product is present during the expression process. **(C)** The full-length-mPER2 and degraded-mPER2 products after precision protease cleavage on GST column. **(D)** Immunoblot to identify the full-length mPER2 by using anti-His serum to detect mPER2-His6. A CBB-stained SDS-PAGE gel of the final purified product is shown in Figure S1.

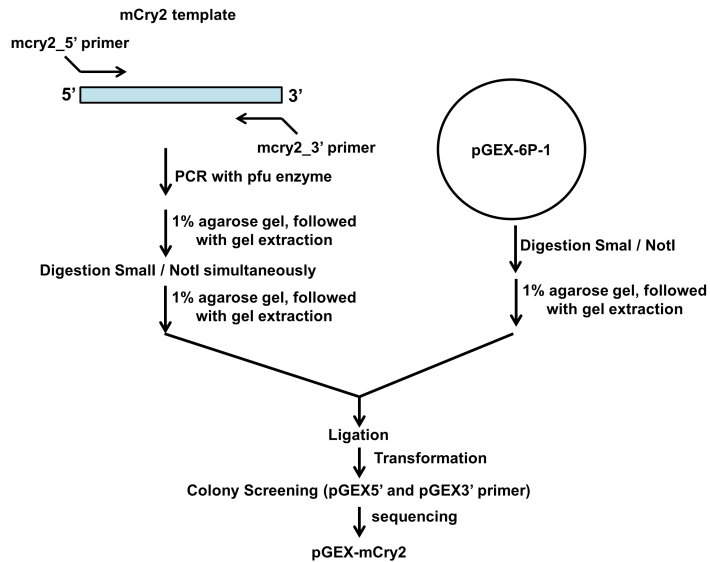

**Figure S4. Procedure for cloning pGEX-mCry2.**

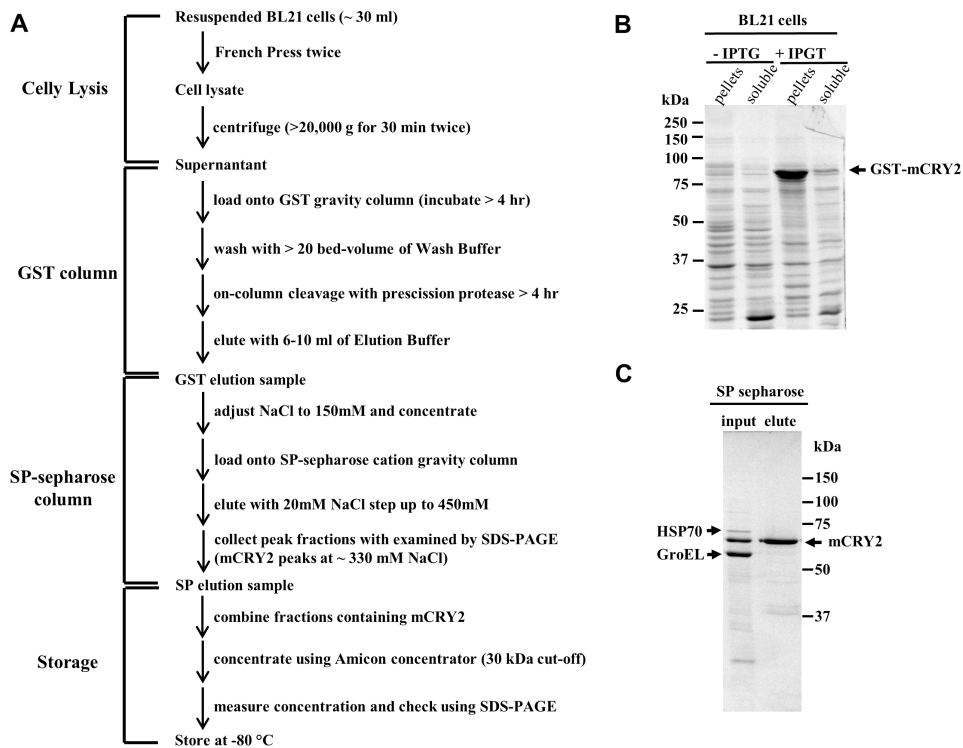

**Figure S5. mCRY2 purification process. (A)** Diagram for mCRY2 purification by two steps, GST affinity and SP cation ion exchange. **(B)** The expression of GST-mCRY2 in BL21 cells in the presence of 0.2 mM IPTG. A significant portion of the expressed GST-mCRY2 is insoluble (“pellets”). **(C)** SP sepharose cation ion exchange removes the HSP70 and GroEL contaminants from the mCRY2 after the GST affinity preparation (CBB-stained SDS-PAGE gel band).

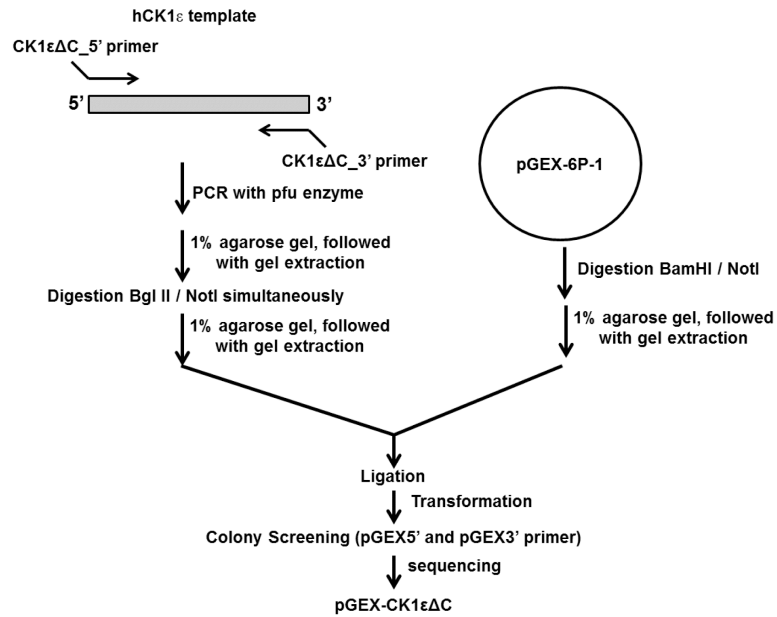

**Figure S6. Procedure for cloning pGEX-CK1 $\epsilon$  $\Delta$ C.**

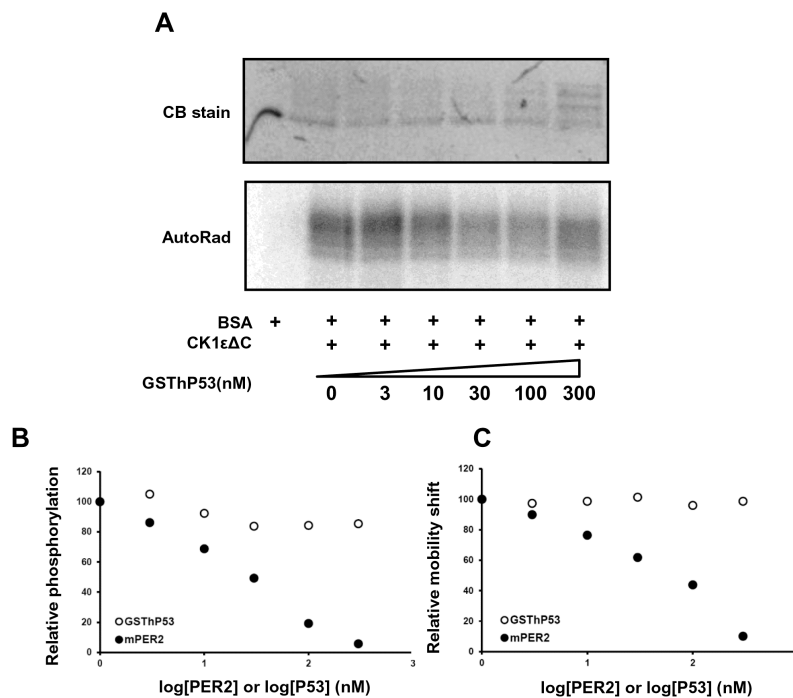

**Figure S7. CK1 $\epsilon$  is not inhibited by substrates other than mPER2. (A)** Varying P53 concentration does not affect the kinase activity of CK1 $\epsilon$  $\Delta$ C on the BSA substrate. **(B)** Quantification of the relative phosphorylation intensity in panel A (for P53) as compared with Figure 1 (for mPER2). **(C)** Quantification of the relative mobility shift in panel A (for P53) as compared with Figure 1 (for mPER2).

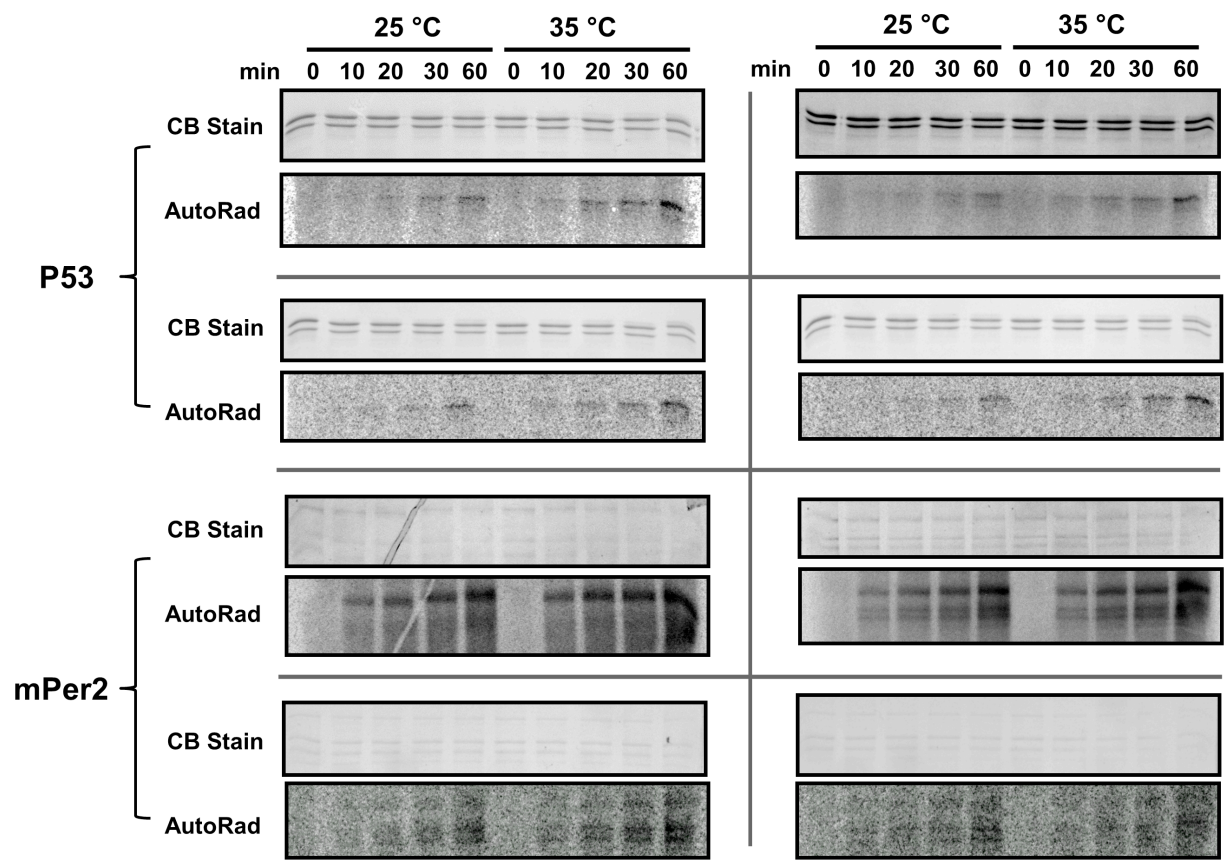

**Figure S8. Substrate dependent temperature sensitivity/compensation of CK1 $\epsilon$  $\Delta$ C.**  
 Replicate experiment to that shown in Figure 5 to assess  $Q_{10}$  of CK1 $\epsilon$  $\Delta$ C activity.

## Supplemental Tables

**Supplementary table S1. Primers and sites using to clone the expression constructs used in this study.**

| Construct   | 5' Primer                                 | 3' Primer                                                                | Cloning sites | Protein tag        | Extra AA at N-terminus                       |
|-------------|-------------------------------------------|--------------------------------------------------------------------------|---------------|--------------------|----------------------------------------------|
| pGEX-mPer2  | GGACTCGAGATGAATGGATA<br>CGTGGACTTCTCCCAAG | GATGCGGCCGCTTAATGATGAT<br>GATGATGATGGGATCCACCCGT<br>CTGGCCTCTATCCTGGGGCC | XhoI / NotI   | His6 at C-terminus | Gly-Pro-Leu-Leu-Glu-                         |
| pGEX-mCry2  | CCGCCCGGGTGCGGCGGCT<br>GCTGTGGTGGCAGC     | GATGCGGCCGCTTAGGAGTCC<br>TTGCTTGCTGGCTC                                  | SmaI / NotI   | N/A                | Gly-Pro-Leu-Gly-Ser-Pro-<br>Glu-Phe-Pro-Gly- |
| pGEX-CK1εΔC | GGAAGATCTGAGCTACGTGT<br>GGGAACAAGTACCGC   | AATAGCGGCCGCGAATTCTCA<br>CTACTGCCCCATCCTCTCCTCG<br>CGTTC                 | BamHI / NotI  | N/A                | Gly-Pro-Leu-Gly-Ser-                         |

**Other constructs used in this study are:**

**pGEX-human p53-(1-393) (Addgene ID 24860)**

**PP1 7-300 (Addgene ID 26566)**

**pRSET-CK1ε (Gift from Dr. Virshup)**

**Table S1. Primers and sites using to clone the expression constructs used in this study.**

**Supplementary table S2. Intracellular transcription factor concentrations.**

**Intracellular transcription factor (TF) concentrations. \***

| <b>Protein Name</b> | <b>Value</b>                      | <b>Concentration over total cell volume **</b> |
|---------------------|-----------------------------------|------------------------------------------------|
| P53 (TF)            | 21,000 – 195,700 molecules / cell | ~21 – 200 nM                                   |
| NF-κB P65 (TF)      | 120,000 molecules / cell          | ~ 120 nM                                       |
| ER (TF)             | 260,000 molecules / cell          | ~ 11 nM                                        |
| SMAD4 (TF)          | 93,000 – 120,000 molecules / cell | ~ 93 – 120 nM                                  |
| AHR (TF)            | 120,000 molecules / cell          | ~ 12 nM                                        |
| MYC (TF)            | 60,000 molecules / cell           | ~ 60 nM                                        |
| H2A (Histones)      | 1.5e+8 molecules / cell           | ~ 150 mM                                       |

\* Resource: Milo et al. Nucl. Acids Res. (2010) 38: D750-D753. “BioNumbers” (<http://bionumbers.hms.harvard.edu/default.aspx>).

\*\* The concentration is estimated on the basis of an average mammalian cell volume of 2,000  $\mu\text{m}^3$ ; the nucleus is about 10% of the volume, so the concentration of the TFs if they are totally in the nucleus would be approximately 10X the value tabulated here.

**Table S2. Estimation of intracellular concentrations of typical transcription factors (TF) concentrations.** The concentration is estimated on the basis of an average mammalian cell volume of 2,000  $\mu\text{m}^3$ ; the nucleus is about 10% of the volume, so the concentration of the TFs if they are totally in the nucleus would be approximately 10X the values tabulated here. Data from: Milo et al. Nucl. Acids Res. (2010) 38: D750-D753. “BioNumbers” (<http://bionumbers.hms.harvard.edu/default.aspx>).
